# Supplementary material
Source: MDPI journal article supplement (https://www.mdpi.com/2571-8789/8/2/39)
Supplement: s1 [file s1]

Supporting Material

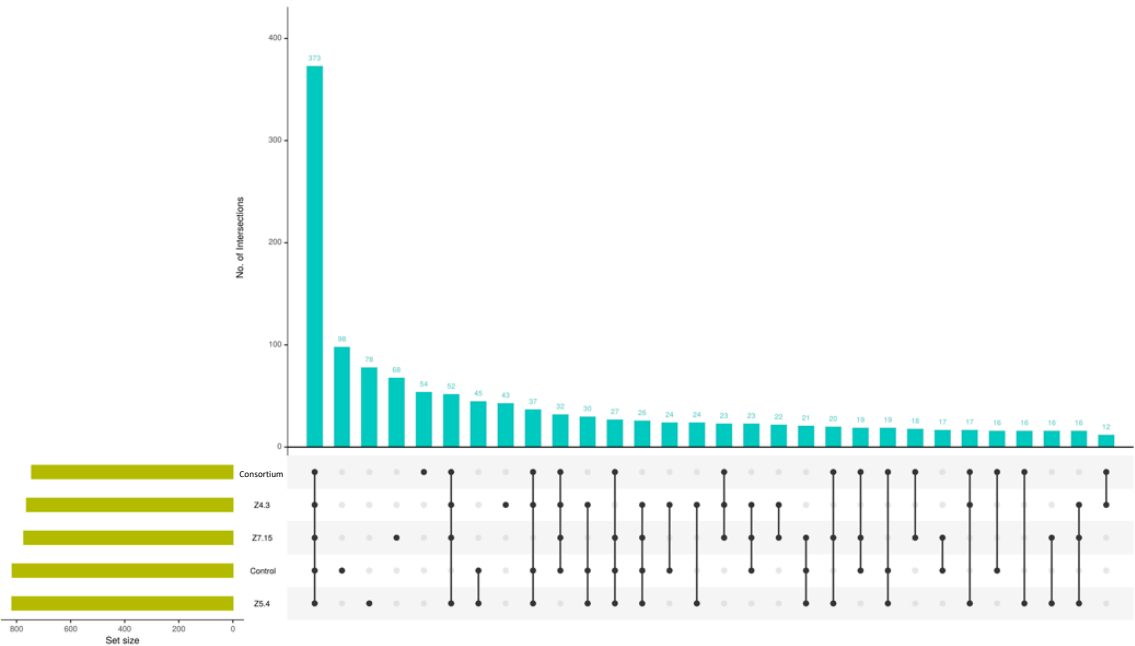

**Figure S1.** Number of unique bacterial taxa (species) in the different treatments in Autumn sampling (plants in nursery, before transplanting).

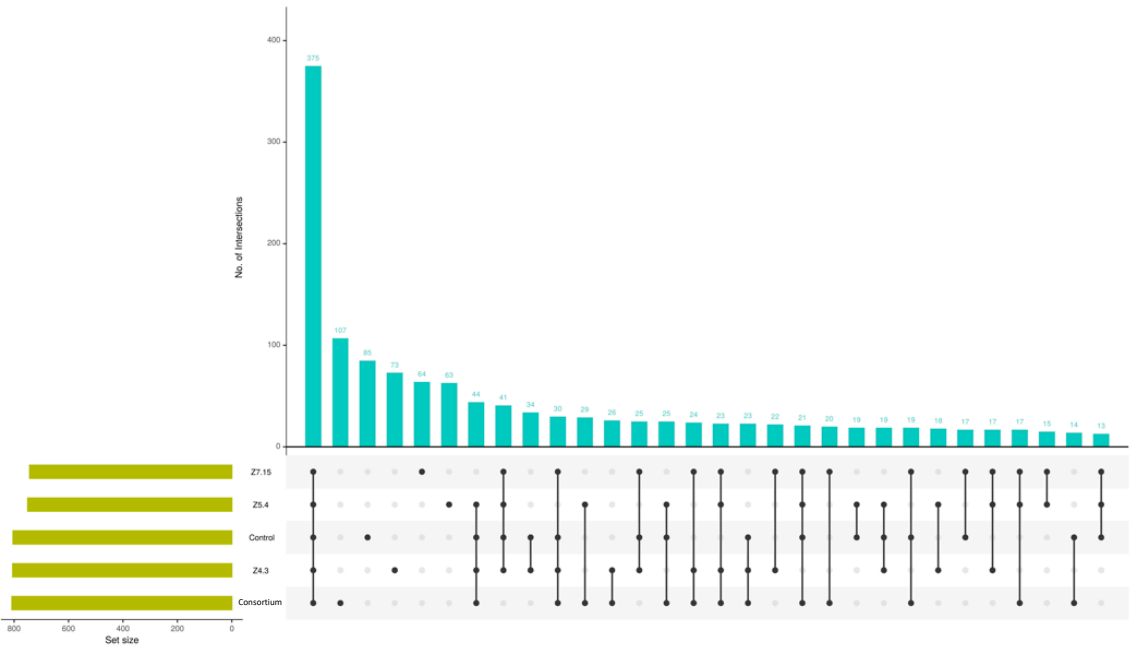

**Figure S2.** Number of unique bacterial taxon (species) in the different treatments in Spring sampling (after trasplanting).

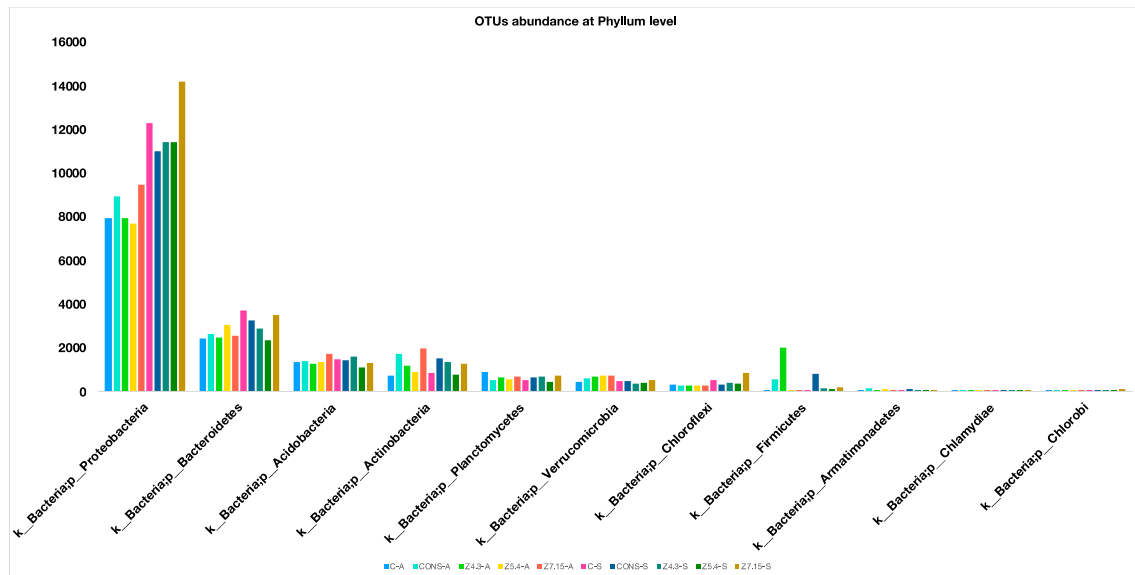

**Figure S3.** OTUS abundance at phylum level. Data obtained from analysis done by EasyMap.

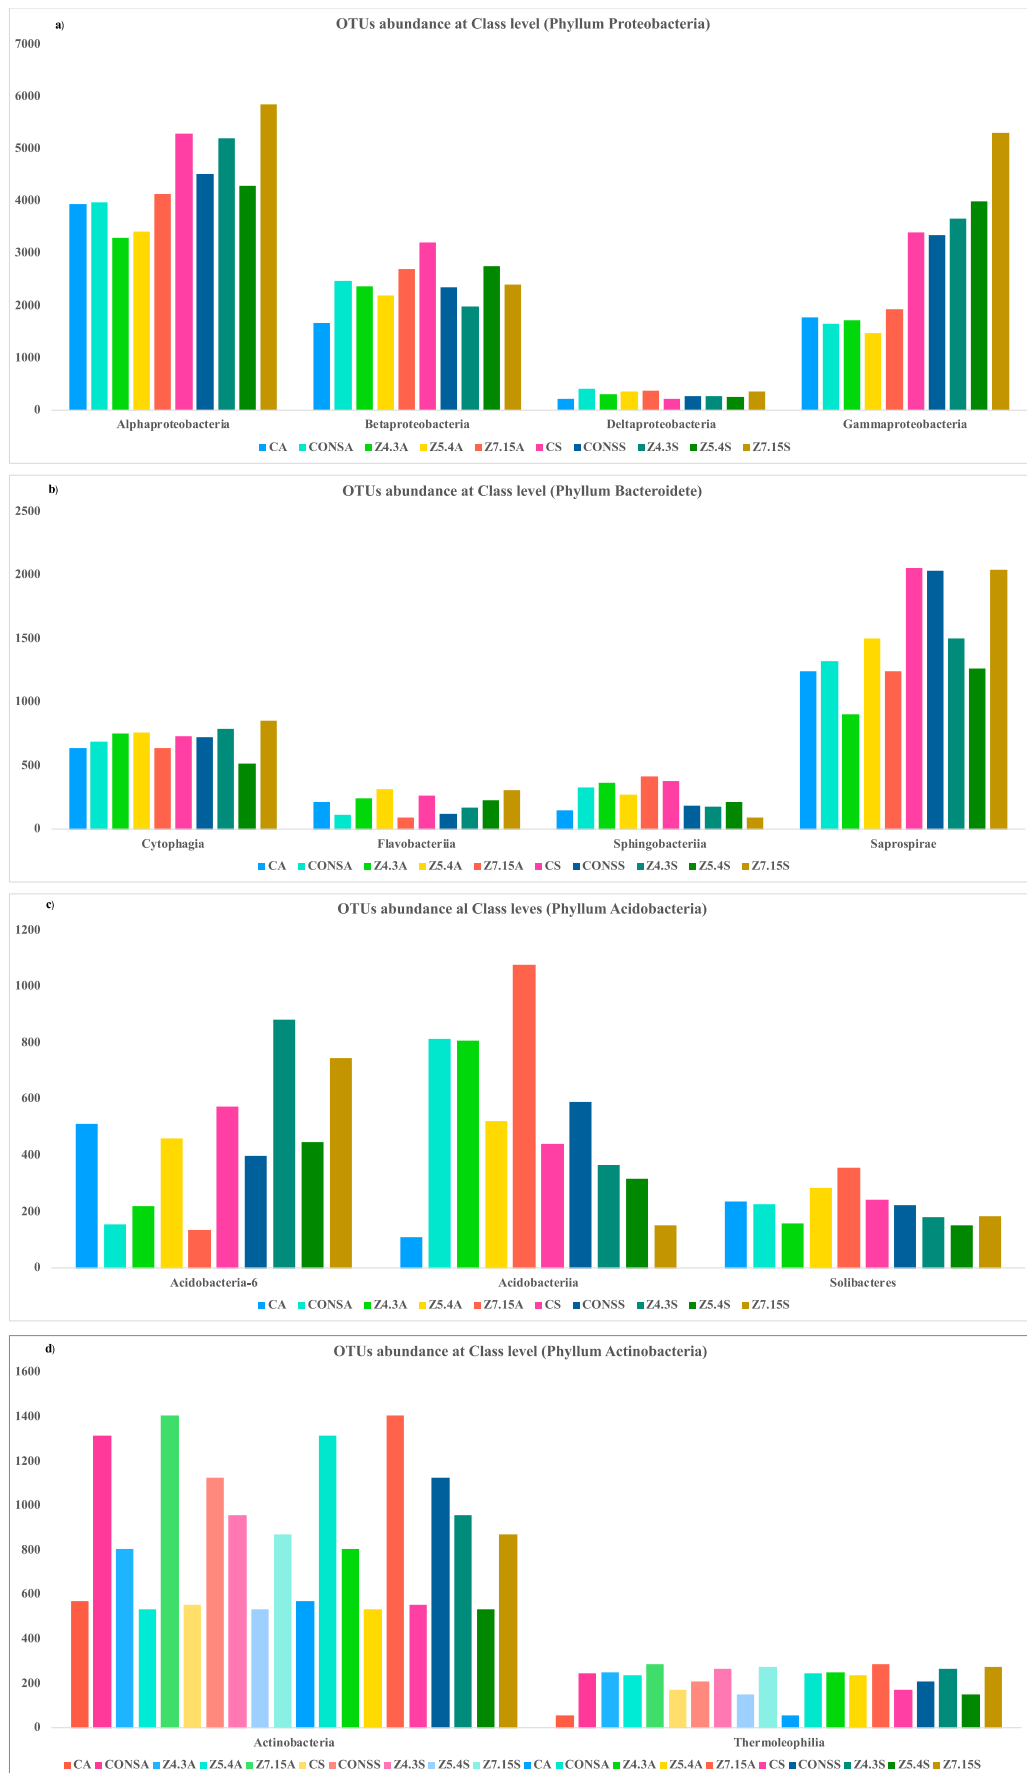

**Figure S4.** OTUS abundance at class level: a) phylum Proteobacteria; b) phylum Bacteroidetes; c) phylum Acidobacteria and d) phylum Actinobacteria. Data obtained from analysis done by EasyMap.

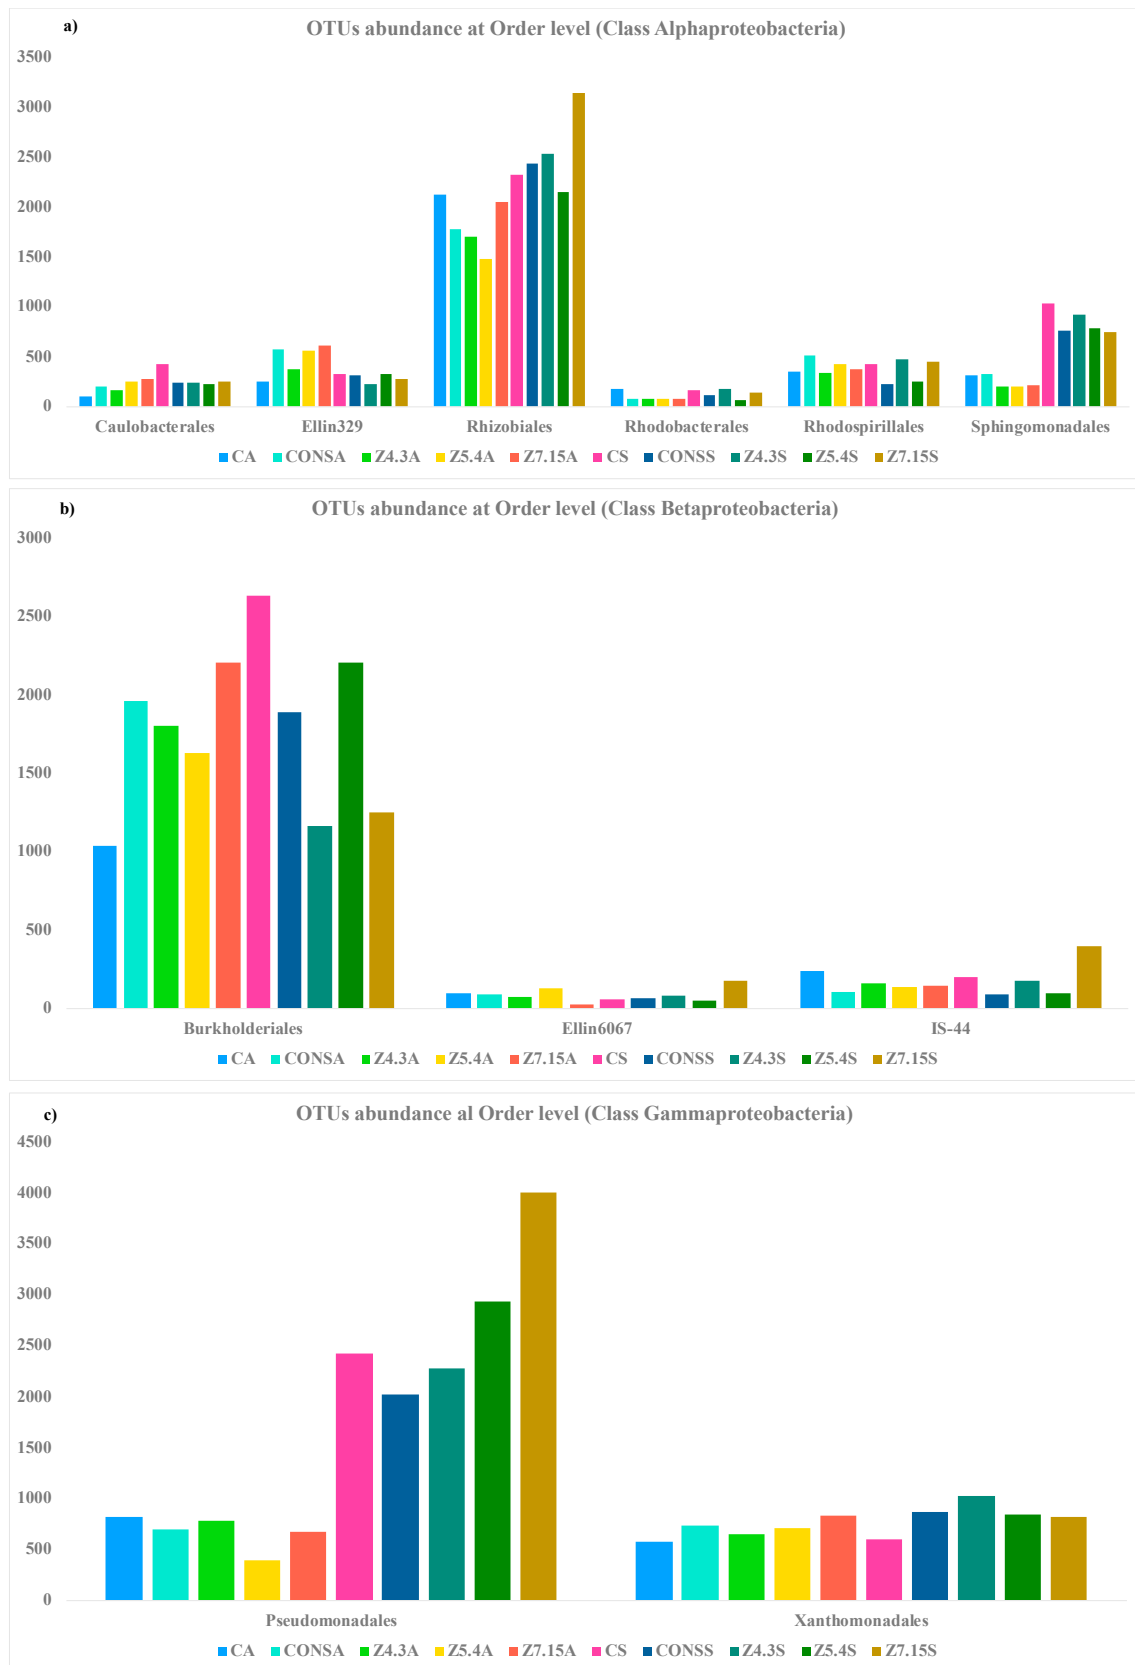

**Figure S5.** OTUs abundance at order level: a) class Alphaproteobacteria; b) class Betaproteobacteria and c) class Gammaproteobacteria. Data obtained from analysis done by EasyMap.

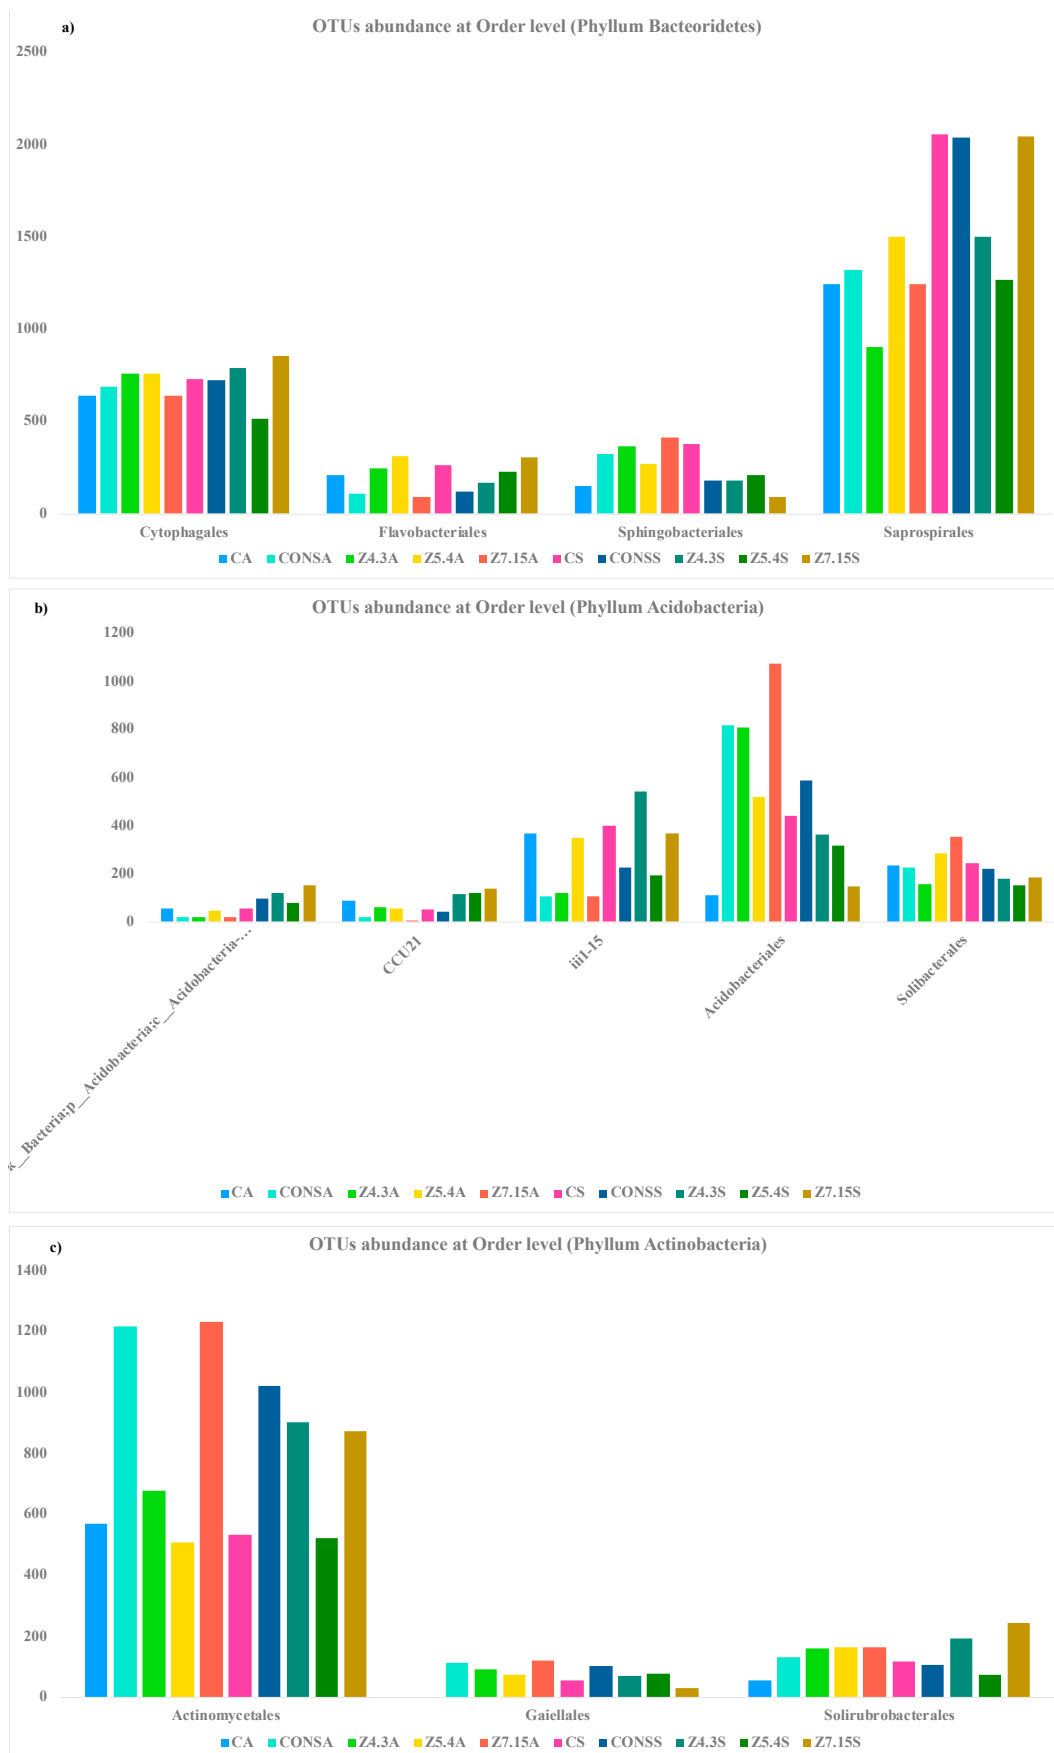

**Figure S6.** OTUS abundance at order level: a) phylum Bacteroidetes; b) phylum Acidobacteria and c) phylum Actinobacteria. Data obtained from analysis done by EasyMap.
